# Supplementary material for: MiRNA Profiling in Plasma Neural-Derived Small Extracellular Vesicles from Patients with Alzheimer’s Disease
Source: MDPI journal article supplement (doi:10.3390/cells9061443), 2020-06-10

**Supplementary Figure 1: NTA analysis of NDEVs** Representative outcome of NTA on neuronal derived small EVs suspension and its negative control is reported.

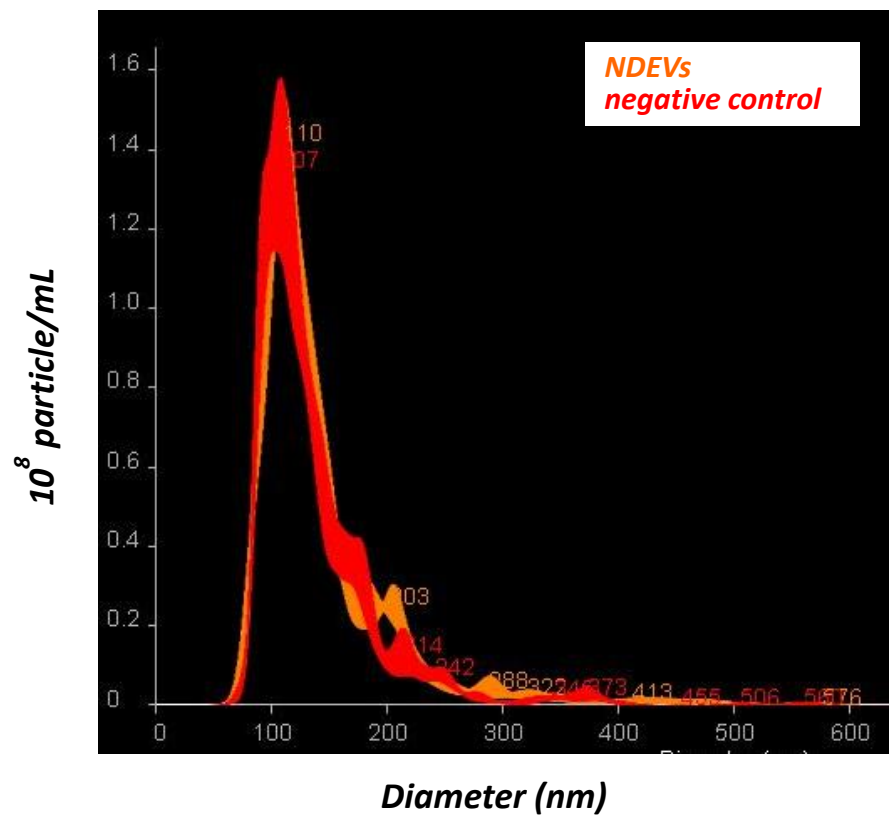

**Supplementary Figure 2:** Representative Agilent 2100 Bioanalyzer results of EV derived RNA.

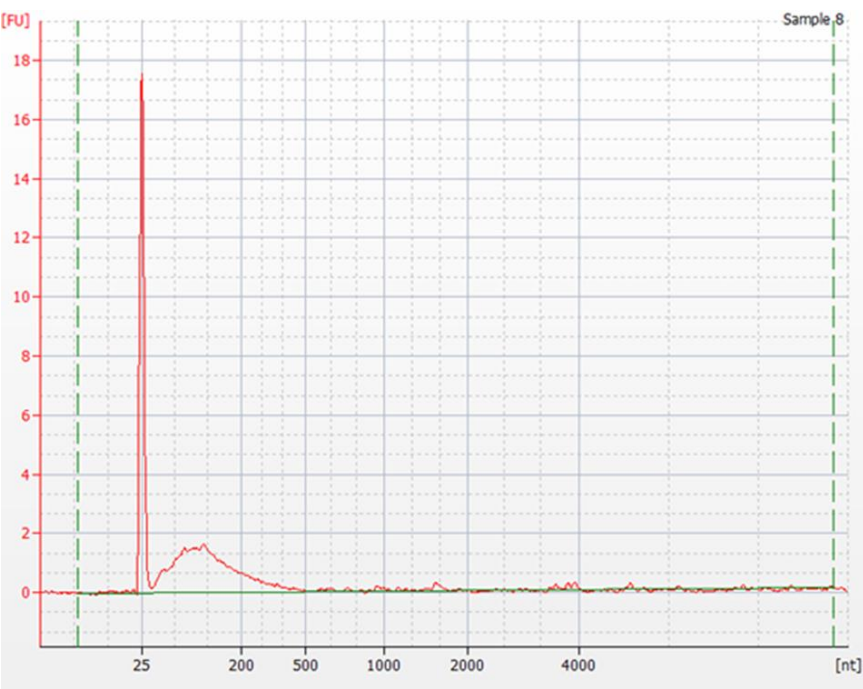

Supplement: s1 [file s1]
