# Supplementary material for: MiRNA Profiling in Plasma Neural-Derived Small Extracellular Vesicles from Patients with Alzheimer’s Disease
Source: Cells. 2020 Jun 10;9(6):1443. doi: 10.3390/cells9061443 (PMC7349735; doi:10.3390/cells9061443)
Supplement: Supplementary file 1 [file cells-09-01443-s001.zip › SupplementaryTab1.xlsx]

## Sheet: Foglio1
Patients	Gender	age of sampling(years)	beta amyloid (pg/ml)	htau (pg/ml)	ptau (pg/ml)
PZ1	F	71	598	1234	124
PZ2	F	75	549	675	86
PZ3	F	69	590	389	57
PZ4	F	73	548	618	86
PZ5	F	75	539	234	42
PZ6	F	76	560	611	88
PZ7	F	74	544	590	78
PZ8	F	68	503	544	74
PZ9	F	67	481	733	101
PZ10	F	78	391	1023	123
PZ11	F	77	365	997	105
PZ12	F	73	560	621	85
PZ13	F	68	421	701	96
PZ14	F	76	515	626	87
PZ15	F	75	525	668	65
PZ16	F	72	338	975	127
PZ17	F	75	479	678	76
PZ18	F	73	486	754	96
PZ19	F	69	562	610	85
PZ20	F	74	598	578	73
PZ21	F	68	560	687	86
PZ22	F	77	587	611	87
PZ23	F	71	555	401	61
PZ24	F	73	545	592	79
PZ25	F	74	422	638	88
PZ26	M	76	456	707	99
PZ27	M	69	579	504	73
PZ28	M	68	406	856	122
PZ29	M	75	555	432	63
PZ30	M	74	418	567	69
PZ31	M	71	333	926	122
PZ32	M	73	490	548	76
PZ33	M	74	482	765	110
PZ34	M	74	555	427	67
PZ35	M	69	501	357	57
PZ36	M	71	539	544	71
PZ37	M	75	487	718	108
PZ38	M	74	598	698	87
PZ39	M	75	600	358	58
PZ40	M	74	597	763	123
HC1	F	55	1110	348	55
HC2	F	58	1099	484	58
HC3	F	59	1023	432	60
HC4	F	65	960	570	61
HC5	F	64	912	548	66
HC6	F	57	924	488	67
HC7	F	56	977	464	68
HC8	F	68	724	475	71
HC9	F	66	806	560	64
HC10	F	68	876	484	60
HC11	F	65	844	564	97
HC12	F	65	790	454	64
HC13	F	69	809	544	79
HC14	F	73	691	469	67
HC15	F	74	765	567	76
HC16	F	69	801	498	60
HC17	F	66	800	510	58
HC18	F	68	807	483	66
HC19	M	74	775	512	74
HC20	M	69	832	543	99
HC21	M	63	804	484	63
HC22	M	61	732	506	66
HC23	M	74	667	567	79
HC24	M	66	854	537	71
HC25	M	68	876	539	67
HC26	M	69	801	542	72
HC27	M	72	789	559	84
HC28	M	70	854	491	79
HC29	M	65	803	481	78
HC30	M	63	800	558	74
HC31	M	66	701	479	65
HC32	M	68	799	587	69
HC33	M	61	805	504	67
HC34	M	65	843	503	62
HC35	M	76	755	491	99
HC36	M	67	804	498	76
HC37	M	74	700	569	110
HC38	M	71	734	509	89
HC39	M	69	765	549	87
HC40	M	71	806	523	117
