# Supplementary material for: MiRNA Profiling in Plasma Neural-Derived Small Extracellular Vesicles from Patients with Alzheimer’s Disease
Source: Cells. 2020 Jun 10;9(6):1443. doi: 10.3390/cells9061443 (PMC7349735; doi:10.3390/cells9061443)
Supplement: Supplementary file 1 [file cells-09-01443-s001.zip › SupplementaryTable2.xlsx]

## Sheet: Foglio1
miRNA EV Tot	miRNAs overlapped between total and neurally derived EV fraction	mirRNA L1CAM Evs
mirR-150-5p	miR-576-3p	miR-1260a
miR-122-5p	miR-23a-3p	miR-653-5p
miR-148a-3p	miR-146a-5p	miR-190a-5p
miR-487a-3p	miR-223-3p	miR-1-3p
miR-199a-3p	miR-16-5p	miR-448
miR-181a-3p	miR-100-3p	miR-452-3p
let-7a-3p	miR-21-5p	miR-502-3p
miR-125a-5p	miR-144-3p	miR-628-3p
miR126-5p	miR-92a-3p
miR-149-5p	miR-92b-3p
miR-185-5p	miR-516b-5p
miR-186-5p	miR-320a
miR-221-3p	miR-501-3p
miR-22-2p	miR-451a
miR-24-3p	let-7b-5p
miR-25-3p
miR-340-5p
miR-490-3p
miR-652-3p
miR-376a-3p
miR-192-5p
miR-484
miR-15b-5p
miR-27a-3p
miR-26b-5p
miR-483-5p
miR-17-5p
miR-204-5p
miR-146b-5p
miR-20a-5p
miR-1283
miR-185-3p
miR-19a-3p
miR-30a-5p
